# Supplementary material for: Using Social Networks to Estimate the Number of COVID-19 Cases: The Incident (Hidden COVID-19 Cases Network Estimation) Study Protocol
Source: MDPI journal article supplement (doi:10.3390/ijerph18115713), 2021-05-26
Supplement: s1 [file s1]

## **Supplementary**

### **Questionnaire**

#### **INCIDENT**

##### **Descrizione dello studio**

Capire quante persone sono potenzialmente positive al COVID-19 è di fondamentale importanza in un momento di emergenza come questo per definire le iniziative di contenimento dell'epidemia.

L'Università degli Studi di Padova insieme all'Università degli Studi di Torino e la Prochild Onlus hanno ideato lo studio INCIDENT (hIddeN CovID-19 casEs Network esTimation), con il supporto tecnico gratuito offerto da Zeta Research.

INCIDENT si propone pertanto di quantificare il numero di persone con infezioni da COVID-19 non documentate da tampone positivo attraverso il presente questionario volontario, anonimo e gratuito.

Il questionario è composto di 10 domande, di cui 4 socio-demografiche, 6 riguardanti il COVID-19 e l'attuale situazione di emergenza, e l'ultima è una domanda casuale per stimare la dimensione della rete di conoscenze.

I dati raccolti saranno trattati ad esclusivi fini di ricerca e divulgazione scientifica.

##### **Definizione di conoscenza**

In questo studio per conoscenza intendiamo qualcuno con cui hai reciproca conoscenza, di vista o di nome, oppure qualcuno con cui hai avuto un contatto (di persona, via telefono o per corrispondenza) negli ultimi due anni e che possa ripetersi oggi<sup>1,2</sup>.

#### **DOMANDE**

- 1) Quanti anni hai?
- 2) Sesso
- 3) Paese d'origine
- 4) In che provincia risiedi attualmente?

##### *Domande sulla sintomatologia*

- 5) Quante persone conosci che hanno avuto almeno un sintomo come febbre ( $>37.5^{\circ}\text{C}$ ), tosse secca, mal di gola, congestione nasale, malessere, mal di testa, dolore muscolare nelle ultime due settimane?

##### *Domande sull'esposizione*

- 6) Quante persone conosci che sono risultate positive al tampone per il COVID-19?

##### *Domande sulle misure di sicurezza*

- 7) Quante persone conosci che condividono l'abitazione con soggetti in isolamento a causa di manifestazione di sintomi simil-influenzali?

*Domande relative agli spostamenti*

- 8) Quante persone conosci che si sono spostate da una regione all'altra per rimanervi stabilmente dopo l'emanazione del decreto #iorestoacasa (D.P.C.M. 08.03.2020)?

*Domanda random per definire il social network*

- 9) Domanda per social network (random)

**REFERENCES**

1. Bernard HR, Hallett T, Iovita A, et al. Counting hard-to-count populations: the network scale-up method for public health. *Sex Transm Infect.* 2010;86(Suppl\_2):ii11-ii15. doi:10.1136/sti.2010.044446
2. Bernard HR, Johnsen EC, Killworth PD, Robinson S. Estimating the size of an average personal network and of an event subpopulation: Some empirical results. *Soc Sci Res.* 1991;20(2):109-121.
